# Supplementary material
Source: HighWire-hosted journal article supplement (https://jnm.snmjournals.org/highwire/filestream/94024/field_highwire_adjunct_files/0/062331_Suppemental_Figure_1.pdf)
Supplement: 062331_Suppemental_Figure_1.pdf [file 062331_Suppemental_Figure_1.pdf]

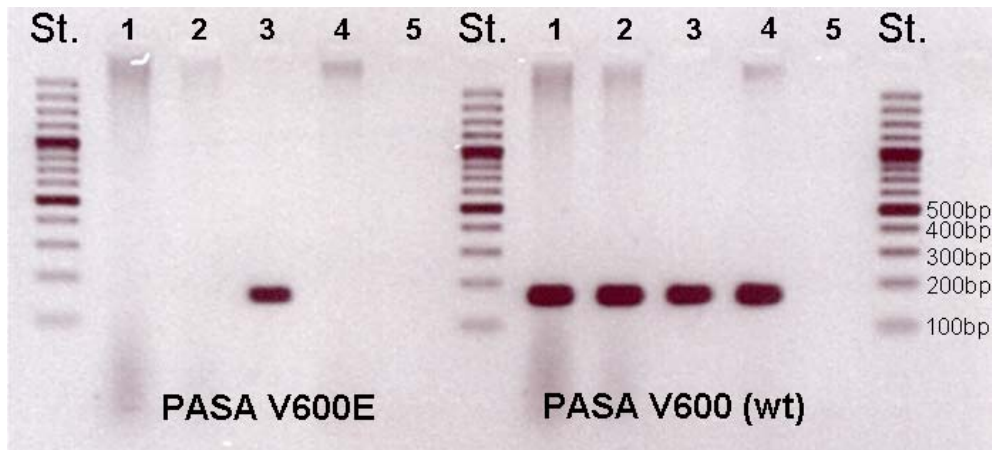

**SUPPLEMENTAL FIGURE 1. Analysis of BRAF<sup>V600E</sup> by PCR amplification of specific alleles (PASA).** PASA V600E did not reveal V600E mutation in ML-1 cells (left, lane 2), whereas BRAF<sup>V600E</sup> was found in control cells (left, lane 3). Legend: St.: size standard; 1: thyroid cancer cell line derived from a papillary carcinoma (ONCO-DG1); 2: ML-1; 3: positive control with known BRAF<sup>V600E</sup> derived from a colon carcinoma (HT29); 4: negative control; 5: water (purity control). BRAF<sup>V600E</sup> occurs only heterozygously, in the right panel, therefore, all samples tested carry the wild-type (wt) allele.
